# Supplementary material for: Stimuli-responsive hydrogel consisting of hydrazide-functionalized poly(oligo(ethylene glycol)methacrylate) and dialdehyde cellulose nanocrystals
Source: Royal Society of Chemistry journal article supplement (doi:10.1039/d0ma00397b), 2020-01-01
Supplement: d0ma00397b1.pdf [file d0ma00397b1.pdf]

## Supporting information

# **Stimuli-responsive Hydrogel Consisting of Hydrazide- Functionalized Poly(oligo(ethylene glycol) methacrylate) and Dialdehyde Cellulose Nanocrystals**

Rasool Nasser<sup>a,b</sup>, Kam C. Tam<sup>\*a,b</sup>

<sup>a</sup>Department of Chemical Engineering, University of Waterloo, 200 University Avenue  
West, Waterloo, Ontario, Canada N2L 3G1

<sup>b</sup>Waterloo Institute for Nanotechnology, University of Waterloo, 200 University Avenue  
West, Waterloo, Ontario, Canada N2L 3G1

### Calculation of the theoretical molecular weight of POEGMA-H copolymer:

The theoretical molecular weight of POEGMA-H was estimated by Eq. S1:

$$([MEO2MA]+[OEGMA300]+[MAA])/[2f-BiB] \times \text{average molecular weight of monomers} \times \text{conversion} \quad (S1)$$

where the total mass of monomers that are converted to polymer is divided by the mole of initiator (one initiator molecule is present in each chain) to calculate the average molecular weight of the chains.

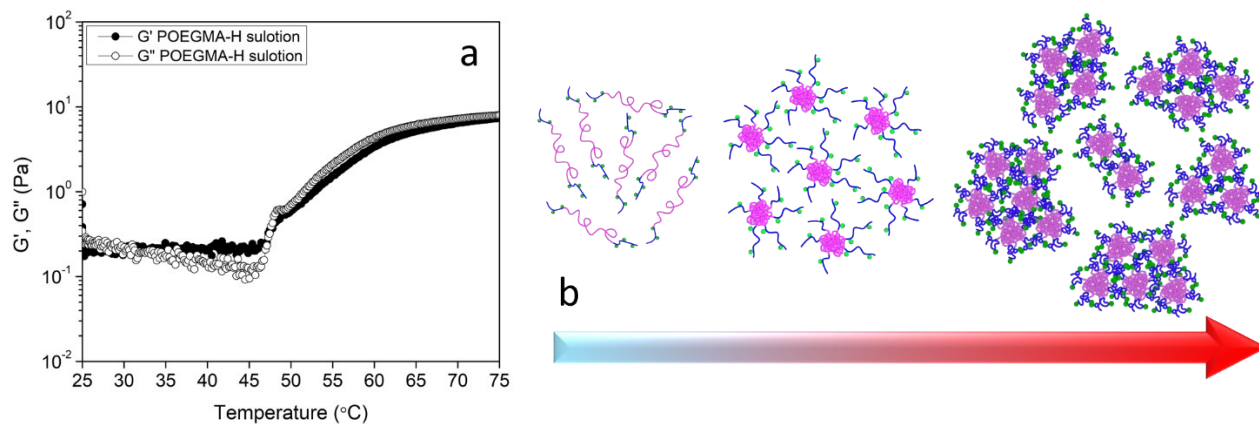

Figure S1. (a) Temperature sweep test of 20 wt % POEGMA-H aqueous solution at 1 Hz and 1 % strain. (b) Schematic representation of coil to globule transitions for middle and end blocks of POEGMA-H chains. Number of collapsed micelles presented in one cluster is more than what is shown here.

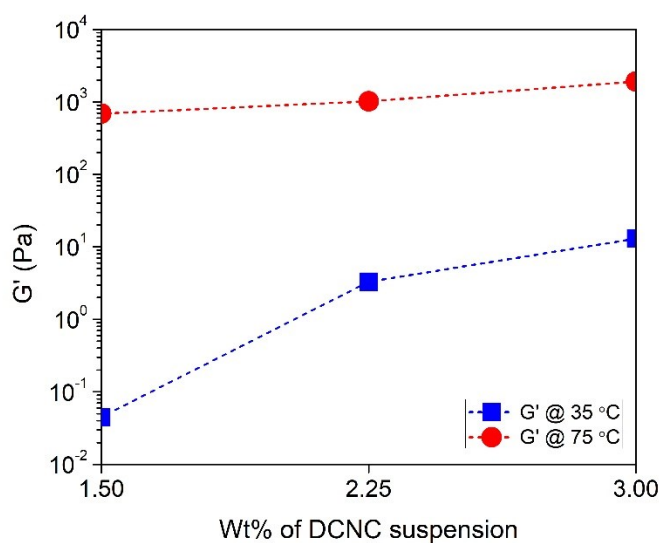

Figure S2. Effect of concentration of DACNC on the storage modulus of hydrogel before and after phase transitions.

Table S1. Estimates of  $\beta$  along with their associated temperature ranges for Gel1.5M, Gel2.25M, and Gel3M. Range of  $\beta$  is based on 95% confidence interval. ( $\ln G_0 = \text{constant} + \ln T + 2\beta T$ )

| wt % of DCNC suspension | Temperature range (°C) | $\beta$            | $R^2$ |
|-------------------------|------------------------|--------------------|-------|
| <b>1.5</b>              | 45-46                  | $1.51 \pm 0.221$   | 0.988 |
|                         | 50-50                  | $0.0799 \pm 0.002$ | 0.992 |
|                         | 62-65                  | $0.294 \pm 0.013$  | 0.993 |
|                         | 68-75                  | $0.006 \pm 0.0003$ | 0.984 |
|                         |                        |                    |       |
| <b>2.25</b>             | 26-30                  | $0.005 \pm 0.0001$ | 0.998 |
|                         | 45-47                  | $0.253 \pm 0.018$  | 0.989 |
|                         | 50-60                  | $0.068 \pm 0.001$  | 0.992 |
|                         | 65-67                  | $0.137 \pm 0.007$  | 0.994 |
|                         | 68-75                  | $0.055 \pm 0.001$  | 0.995 |
| <b>3</b>                | 26-30                  | $0.007 \pm 0.0003$ | 0.989 |
|                         | 46-47                  | $0.233 \pm 0.003$  | 0.999 |

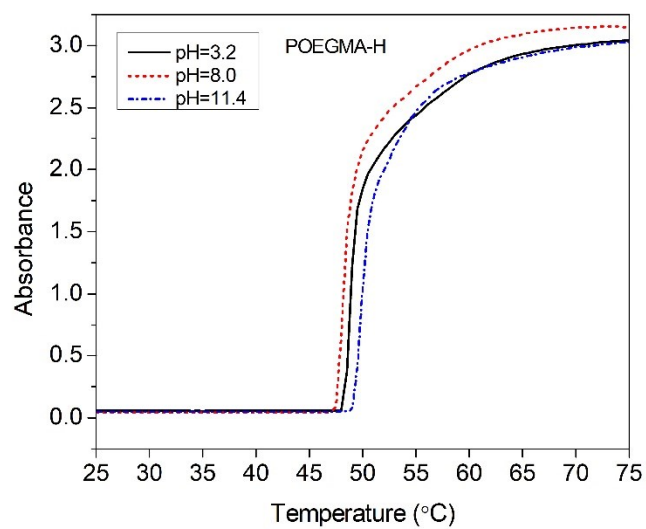

Figure S3. Effect of pH on phase transition of POEGMA-H aqueous solution (5 mg L<sup>-1</sup>).

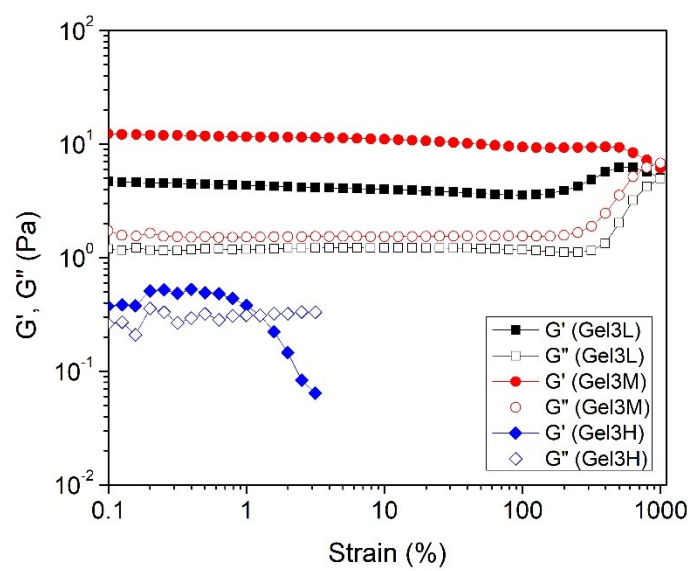

Figure S4. Linear viscoelastic region of Gel3L, Gel3M, and Gel3H at room temperature and 1Hz.

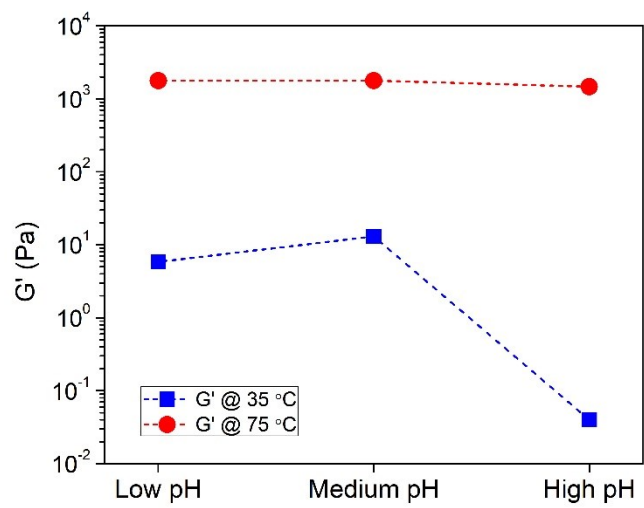

Figure S5. Effect of pH on the storage modulus of hydrogel before and after phase transitions.
